# Supplementary material for: Comparison of blood RNA isolation methods from samples stabilized in Tempus tubes and stored at a large human biobank
Source: PubMed Central journal article supplement (PMC5009671; doi:10.1186/s13104-016-2224-y), 2016-09-01
Supplement: 13104_2016_2224_MOESM1_ESM.pdf [file 13104_2016_2224_MOESM1_ESM.pdf]

## Additional file 1

Title: Target abundance of RNA transcripts

Evaluation of target abundance; i.e., whether low abundant RNA transcripts (RNA transcripts with Cq-values above 30 cycles) could be detected in blood-RNA samples isolated using the five blood-RNA isolation protocols. Low abundant mRNA and miRNA transcripts were detected in all analyzed samples. The average of non-normalized raw Cq-values of all targets from all adult (n=11-12 Tempus tubes) and cord blood (n=3-6 Tempus tubes) samples collected in the Tempus tubes of the blood-RNA samples isolated using the five RNA isolation protocols.

**Table 1. Target abundance of RNA transcripts**

| <b>Gene name</b>                                                             | <b>Average Cq <math>\pm</math> SD</b> |
|------------------------------------------------------------------------------|---------------------------------------|
| <b>High abundant target (Cq &lt; 25)</b>                                     |                                       |
| hsa-let-7a                                                                   | 18.31 $\pm$ 1.95                      |
| hsa-miR-16                                                                   | 16.87 $\pm$ 2.65                      |
| hsa-miR-20a                                                                  | 23.44 $\pm$ 2.99                      |
| hsa-miR-21                                                                   | 24.86 $\pm$ 2.20                      |
| hsa-miR-191                                                                  | 21.61 $\pm$ 2.50                      |
| hsa-miR-451                                                                  | 23.17 $\pm$ 4.04                      |
| <b>Medium abundant target (25 <math>\leq</math> Cq <math>\leq</math> 30)</b> |                                       |
| FOS                                                                          | 28.39 $\pm$ 0.85                      |
| IL1B                                                                         | 29.65 $\pm$ 0.68                      |
| TP53                                                                         | 29.46 $\pm$ 0.54                      |
| hsa-miR-26a                                                                  | 29.26 $\pm$ 3.44                      |
| hsa-miR-93                                                                   | 28.27 $\pm$ 3.21                      |
| hsa-miR-192                                                                  | 25.54 $\pm$ 1.93                      |
| <b>Low abundant target (Cq &gt; 30)</b>                                      |                                       |
| CDKN1A                                                                       | 32.48 $\pm$ 0.64                      |
| IL8                                                                          | 32.19 $\pm$ 1.26                      |
| MYC                                                                          | 30.08 $\pm$ 0.83                      |
| hsa-miR-34a                                                                  | 31.24 $\pm$ 2.10                      |
| hsa-miR-103                                                                  | 31.46 $\pm$ 3.21                      |
| hsa-miR-126                                                                  | 30.27 $\pm$ 2.63                      |
| hsa-miR-423-3p                                                               | 30.30 $\pm$ 3.08                      |
