# Supplementary material for: Comparison of blood RNA isolation methods from samples stabilized in Tempus tubes and stored at a large human biobank
Source: PubMed Central journal article supplement (PMC5009671; doi:10.1186/s13104-016-2224-y), 2016-09-01

## Additional file 2

File format: PDF

Title: Evaluation of reference gene stability

The non-normalized raw *Cq*-values of reference genes for adult (n=11-12 Tempus tubes) and cord blood (n=3-6 Tempus tubes) samples collected in the Tempus tubes of the blood-RNA samples isolated using the five RNA isolation protocols.

### A) Adult blood

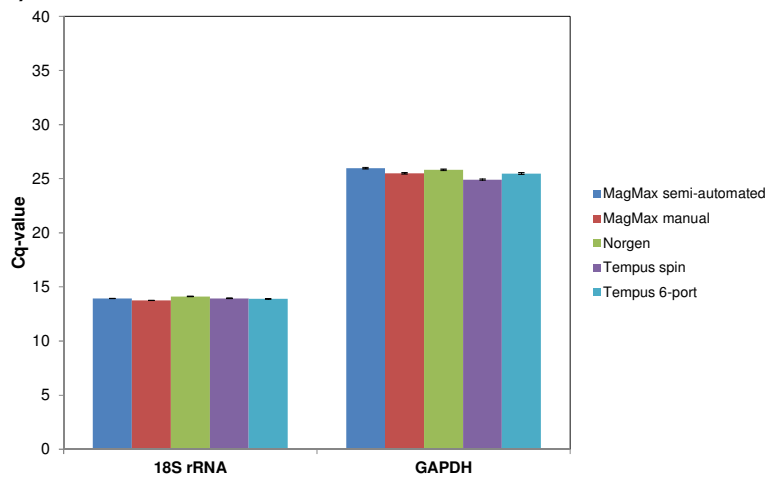

### B) Cord blood

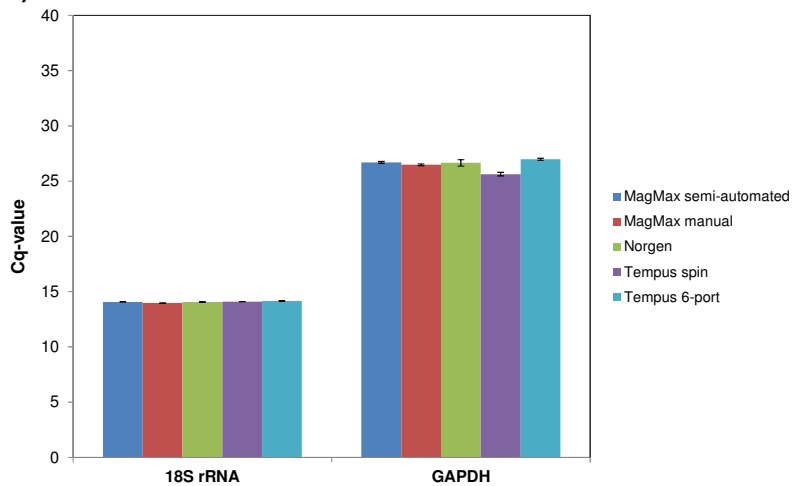

Supplement: 13104_2016_2224_MOESM2_ESM.pdf [file 13104_2016_2224_MOESM2_ESM.pdf]
